# Supplementary material
Source: Springer Nature journal article supplement (https://www.springermedizin.de/resource/supplementary/12914_2013_262_MOESM2_ESM.pdf/9537176)

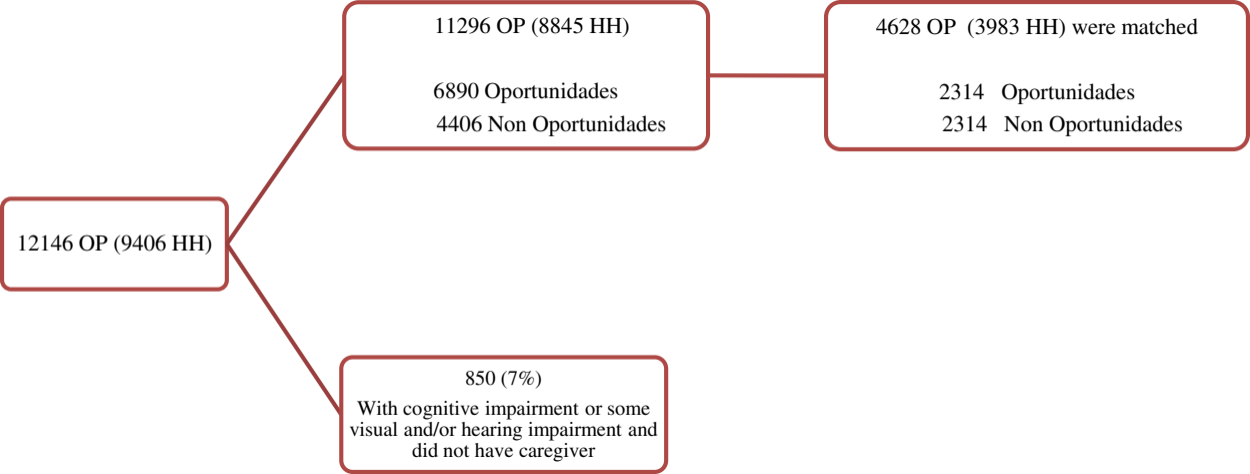

Supplement: MOESM2 [file 9537176]
